# Supplementary material for: Synthesis, structure and high methane storage of pure D6R Yb(Y) nonanuclear cluster-based zeolite-like metal–organic frameworks
Source: Royal Society of Chemistry journal article supplement (doi:10.1039/d2ta02948k), 2022-01-01
Supplement: d2ta02948k1.pdf [file d2ta02948k1.pdf]

# **Synthesis, structure and high methane storage of pure D6R Yb(Y) nonanuclear cluster-based zeolite-like metal-organic frameworks**

Hong-Xin Li,<sup>a</sup> Zong-Hui Zhang,<sup>a</sup> Han Fang,<sup>a</sup> Dong-Xu Xue,<sup>\*a</sup> Junfeng Bai<sup>\*a</sup>

<sup>a</sup> Key Laboratory of Applied Surface and Colloid Chemistry, Ministry of Education, Xi'an Key Laboratory of Organometallic Material Chemistry, School of Chemistry & Chemical Engineering, Shaanxi Normal University, Xi'an 710062, China.

E-mail: xuedx@snnu.edu.cn, bjunfeng@snnu.edu.cn.

## **Table of Contents**

|                                                          |            |
|----------------------------------------------------------|------------|
| <b>1. Materials and general procedures.....</b>          | <b>S2</b>  |
| <b>2. Additional structural figures .....</b>            | <b>S5</b>  |
| <b>3. Powder X-ray Diffraction (PXRD) patterns .....</b> | <b>S8</b>  |
| <b>4. Thermal Gravimetric Analysis (TGA) .....</b>       | <b>S9</b>  |
| <b>5. Low-pressure gas sorption measurements .....</b>   | <b>S10</b> |
| <b>6. High-pressure gas sorption measurements .....</b>  | <b>S14</b> |
| <b>7. Single Crystal X-ray Crystallography Data.....</b> | <b>S19</b> |
| <b>8. References.....</b>                                | <b>S21</b> |

---

## 1. Materials and general procedures

All reagents were obtained from commercial sources and used without further purification. PXRD measurements were performed on a Bruker D8 Advance diffractometer with Cu  $K\alpha$  ( $\lambda = 1.5406 \text{ \AA}$ ), and the X-ray tube was operated at 40 kV and 40 mA. High-resolution thermogravimetric analysis (TGA) was performed under a continuous  $\text{N}_2$  flow and recorded on a Q600SDT thermal analyzer with a heating rate of  $5 \text{ }^\circ\text{C}/\text{min}$ . Elemental analyses (C, H, and N) were obtained from a Vario EL cube analyzer. Fourier transform infrared (FT-IR) spectrum ( $400\text{-}4000 \text{ cm}^{-1}$ , KBr pellet) was collected in the solid state on a Bruker Tensor 27 FT-IR spectrometer.

### Synthesis of Yb-ZMOF-1

A mixture of  $\text{Yb}(\text{NO}_3)_3 \cdot 6\text{H}_2\text{O}$  (40.6 mg, 0.087 mmol),  $\text{H}_2\text{TZDB}$  (13.5 mg, 0.0435 mmol), DMF (2.8 mL) and 2-FBA (FBA = 2-fluorobenzoic acid, 0.20 mL, 3.48 M/DMF) were combined in a 20 mL scintillation vial, sealed and heated to  $120 \text{ }^\circ\text{C}$  for 48 h. The colourless spindly crystals were collected, washed with DMF, and then air-dried. Yield  $\approx 89.6\%$  (based on ligand). Selected IR (KBr,  $\text{cm}^{-1}$ ): 3424 (br), 2928 (w), 1661 (vs), 1604 (s), 1549 (s), 1413 (vs), 1101 (m), 983 (m), 867 (m), 799 (m), 747 (m), 668 (w), 547 (m). Elem. Anal. (%) Calcd for:  $\text{C}_{113}\text{H}_{125}\text{F}_{15}\text{N}_{25}\text{O}_{35}\text{Yb}_9$ : C, 32.04; H, 2.97; N, 8.27. Found: C, 32.46; H, 3.20; N, 7.61.

### Synthesis of Y-ZMOF-1

Similar procedures as synthesizing Yb-ZMOF-1 except that the rare-earth was substituted by  $\text{Y}(\text{NO}_3)_3 \cdot 6\text{H}_2\text{O}$ . Yield  $\approx 86.3\%$  (based on ligand). Selected IR (KBr,  $\text{cm}^{-1}$ ): 3485 (br), 2935 (w), 1663 (vs), 1604 (m), 1555 (m), 1414 (vs), 1253 (m), 1099 (m), 986 (m), 873 (m), 798 (m), 749 (s), 667 (m), 551 (m). Elem. Anal. (%) Calcd for  $\text{C}_{104}\text{H}_{112}\text{F}_{15}\text{N}_{22}\text{O}_{36}\text{Y}_9$ : C, 37.50; H, 3.39; N, 9.25. Found: C, 37.82; H, 3.97; N, 9.09.

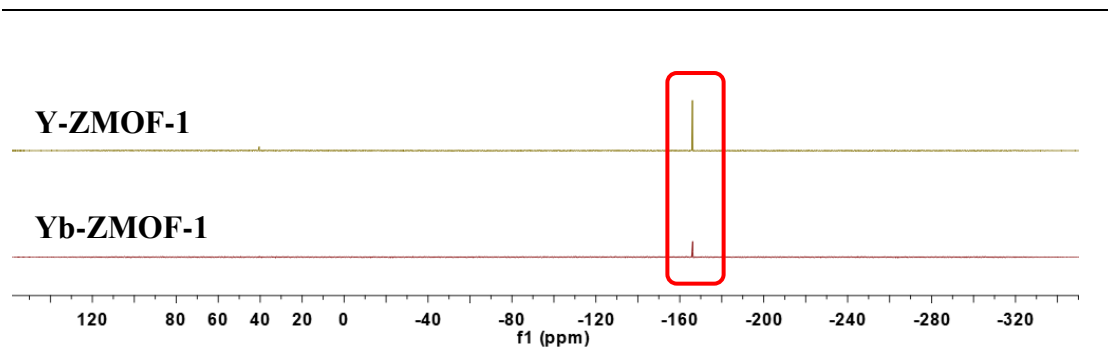

**Fig. S1** The  $^{19}\text{F}$  NMR (400 MHz,  $\text{DMSO-}d_6$ ) spectra of Yb-ZMOF-1 and Y-ZMOF-1. For both materials, there is a small peak at  $\delta = -166$  ppm. This signal is attributed to HF, from the dissolved materials in  $\text{H}_2\text{SO}_4$  and  $\text{DMSO-}d_6$ .

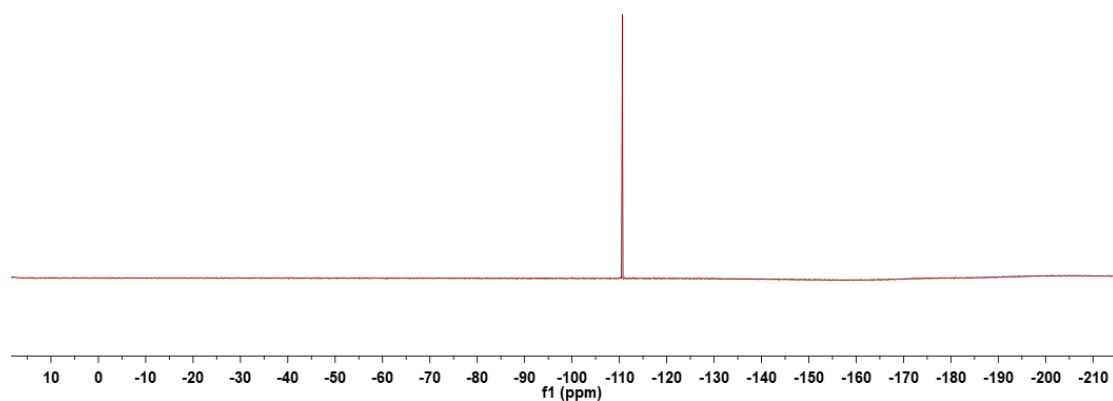

**Fig. S2** The  $^{19}\text{F}$  NMR (400 MHz,  $\text{DMSO-}d_6$ ) spectra of 2-fluorobenzoic acid, it has a peak at  $\delta = -110$  ppm.

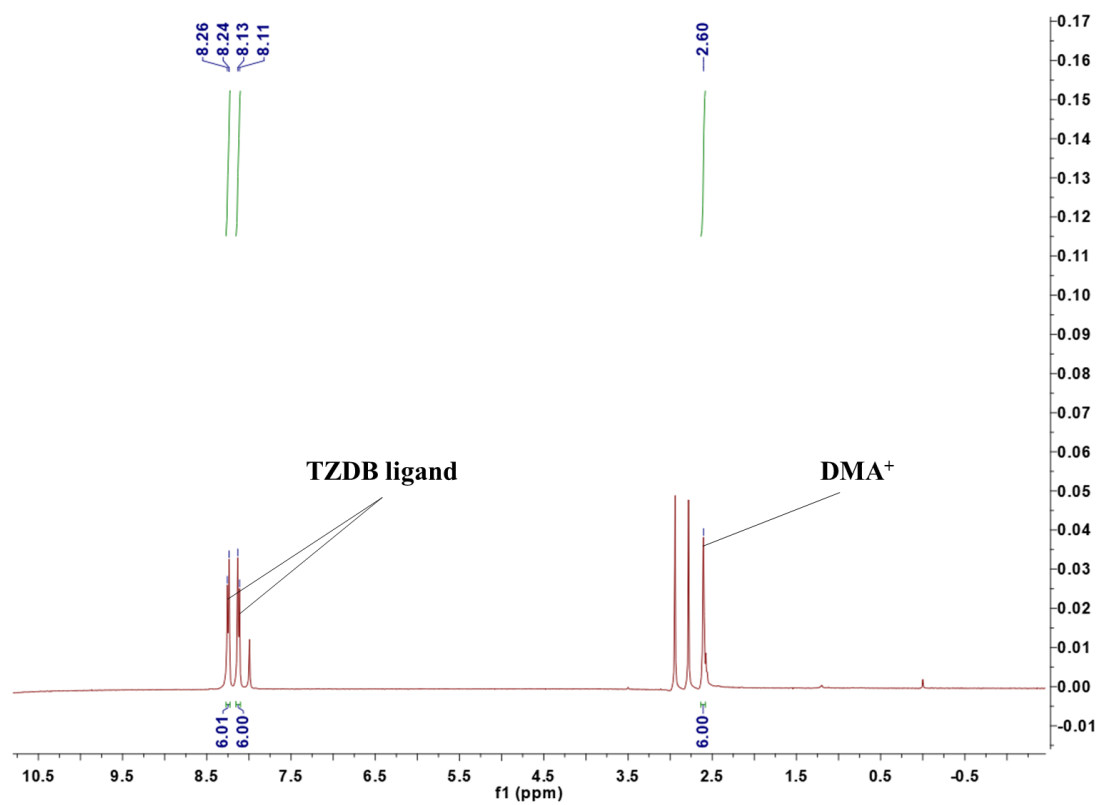

**Fig. S3** The  $^1\text{H}$  NMR (400 MHz,  $\text{DMSO-}d_6$ ) spectra of acid digested as-synthesized Yb-ZMOF-1 samples, the ratio between TZDB and  $\text{DMA}^+$  inside this ZMOF is 3:2.

## 2. Additional structural figures

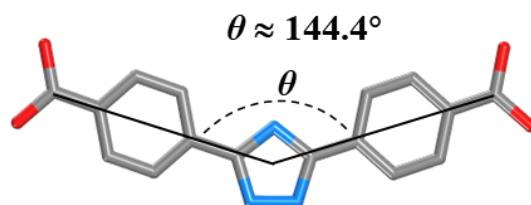

**Fig. S4** Representation of the angular ligand within Yb-ZMOF-1.

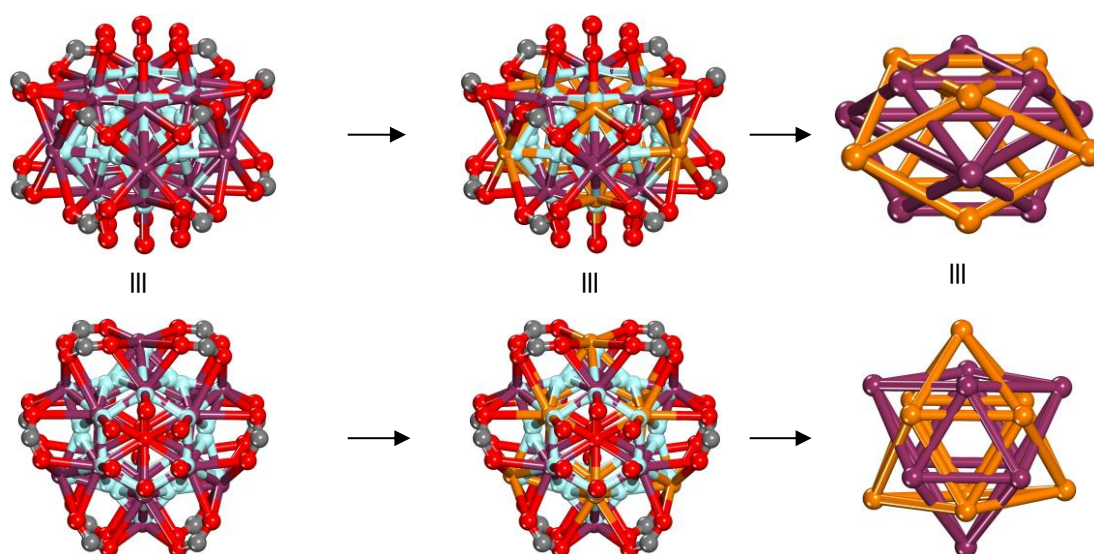

Directly observed disorder cluster

Two overlapping Yb<sub>9</sub> clusters

**Fig. S5** Directly observed disorder cluster in Yb-ZMOF-1, Yb = purple/orange, C = gray, O = red and F = cyan.

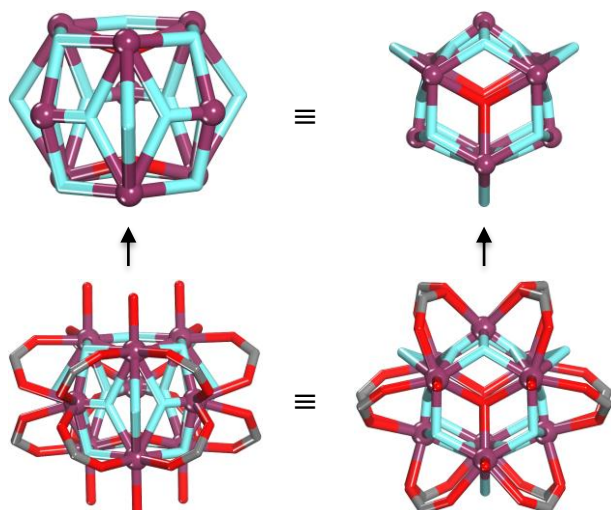

**Fig. S6** Schematic representation of the unique nonanuclear MBB of  $[\text{Yb}_9(\mu_3\text{-F})_{12}(\mu_2\text{-F})_3(\mu_3\text{-O})_2(\text{O}_2\text{C-})_{12}(\text{H}_2\text{O})_6]$  in Yb-ZMOF-1. Yb = purple, C = gray, O = red and F = cyan.

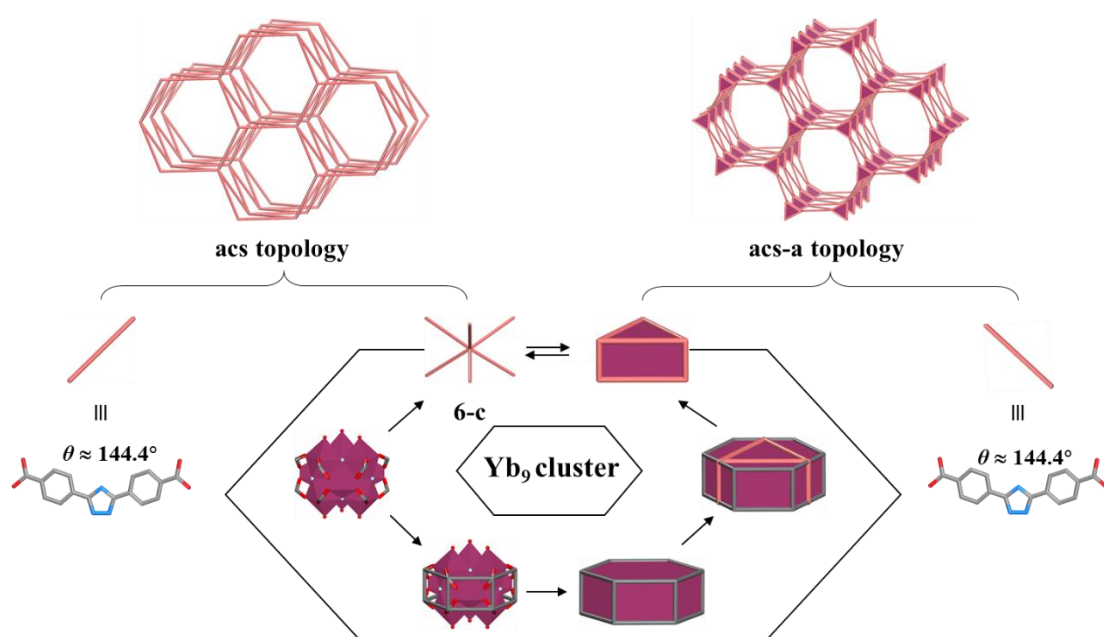

**Fig. S7** Schematic representation of the simplified process of  $\text{Yb}_9$  cluster within Yb-ZMOF-1, and the corresponding **acs** net in node-linker and augmented forms, respectively.

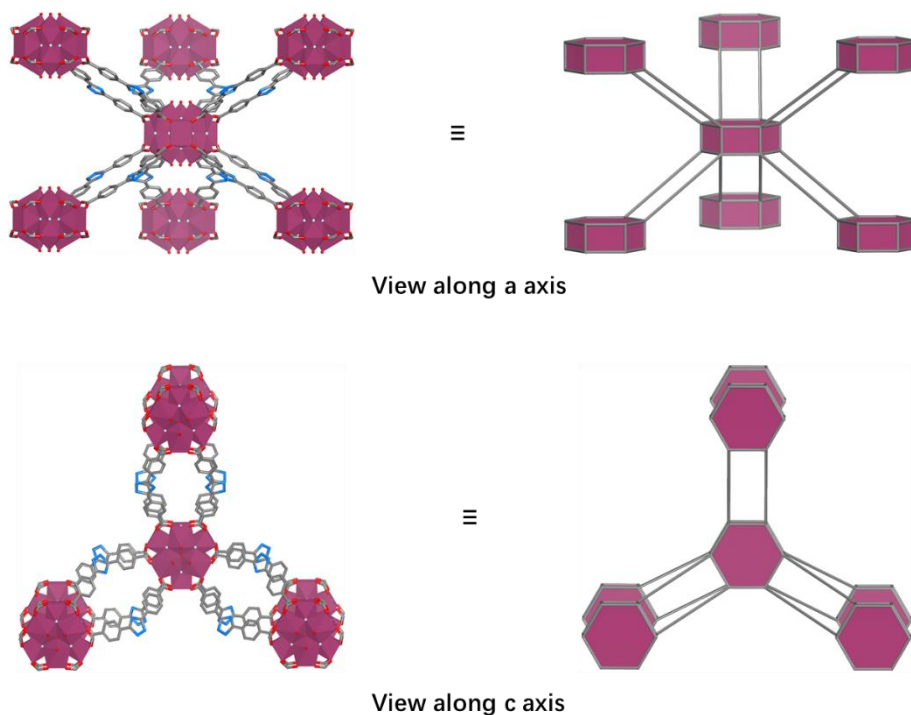

**Fig. S8** The connecting environment of  $\text{Yb}_9$  cluster within Yb-ZMOF-1 in different views.

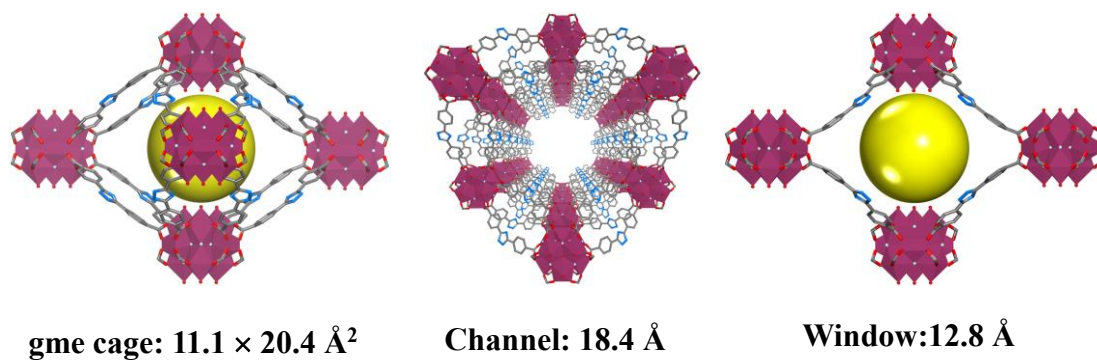

**Fig. S9** Schematic representation of gme cage, one channel, as well as one window and their sizes in Yb/Y-ZMOF-1.

### 3. Powder X-ray Diffraction (PXRD) patterns

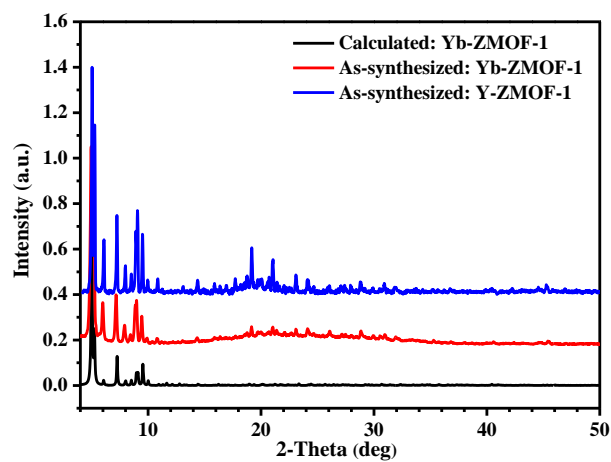

Fig. S10 PXRD patterns of Yb-ZMOF-1 and Y-ZMOF-1.

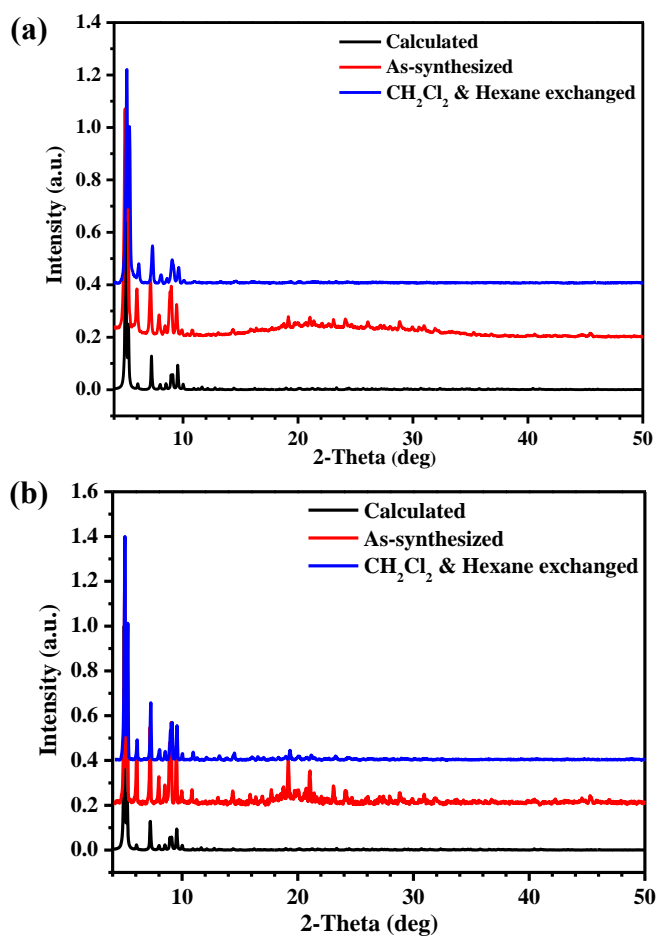

Fig. S11 PXRD patterns of (a) Yb-ZMOF-1 and (b) Y-ZMOF-1 after different treatments.



#### 4. Thermal Gravimetric Analysis (TGA)

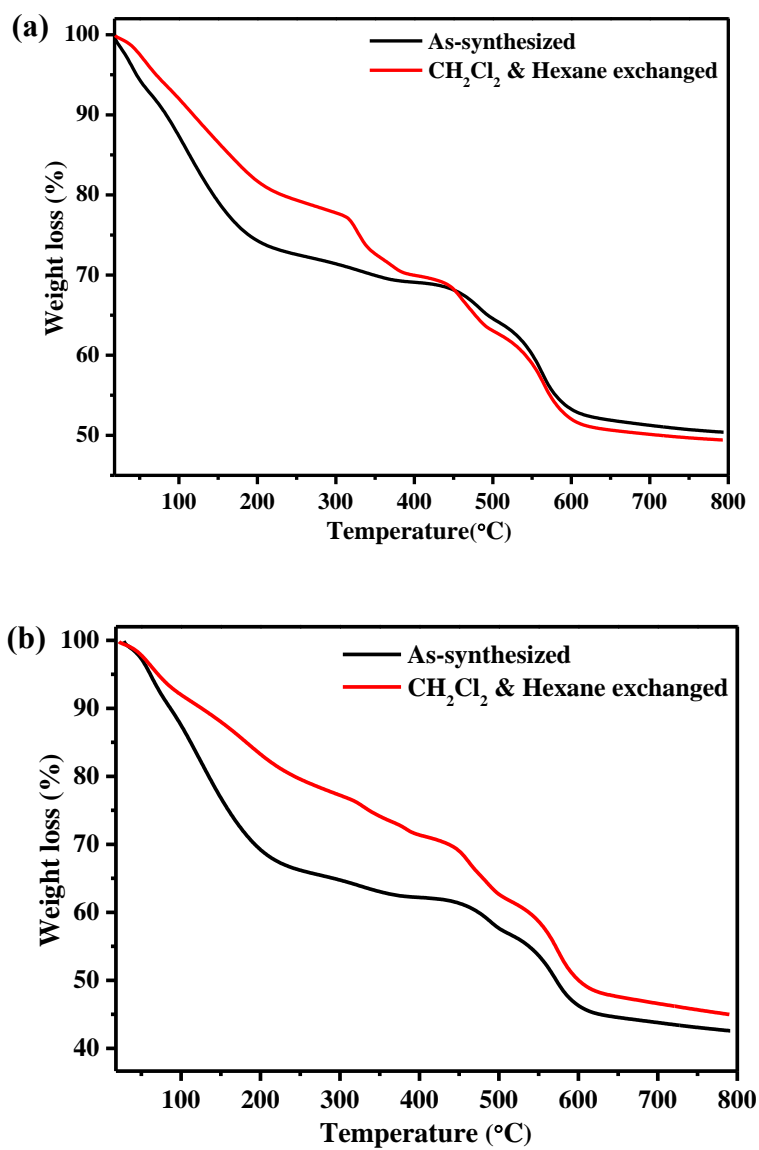

**Fig. S12** TGA plots of the as-synthesized and solvent-exchanged (a) Yb-ZMOF-1 and (b) Y-ZMOF-1.

## 5. Low-pressure gas sorption measurements

Low pressure gas sorption studies were conducted on a fully automated micropore gas analyzer Autosorb-iQ3 (Quantachrome Instruments) at relative pressures up to 1 atm. The cryogenic temperature was controlled using liquid nitrogen at 77 K. The apparent surface areas were determined from the nitrogen adsorption isotherms collected at 77 K by applying the BET models. Pore size analyses were performed using a cylindrical/spherical NLDFT pore model system by assuming an oxidic (zeolitic) surface.

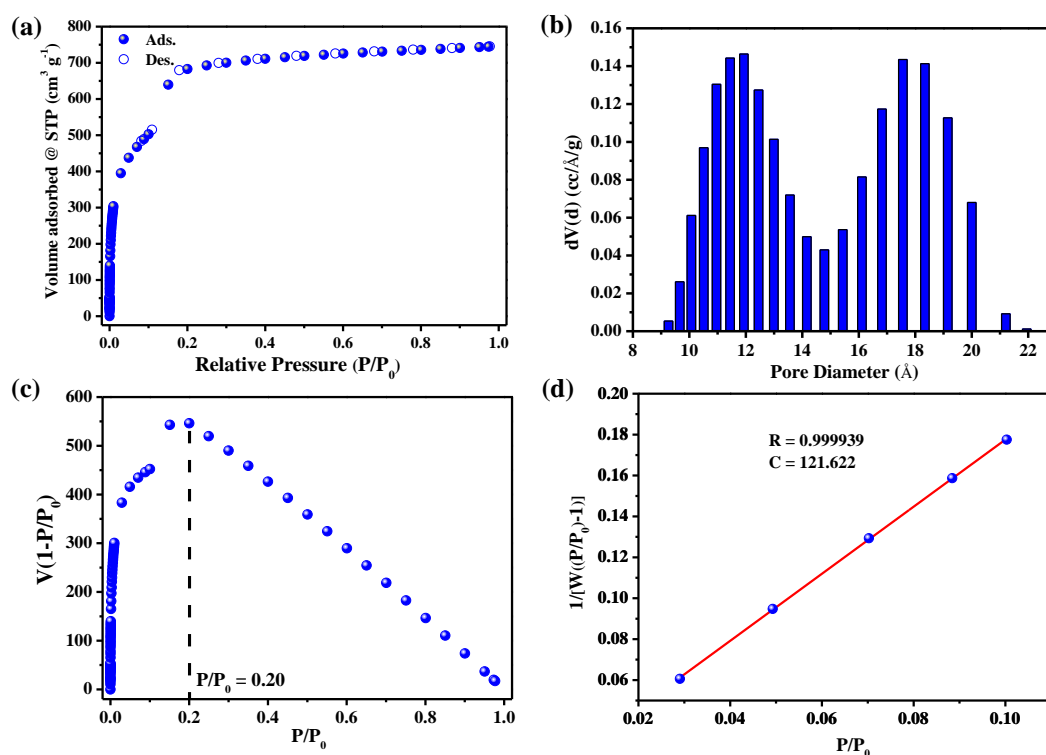

**Fig. S13** (a) Adsorption (closed) / desorption (open) isotherms and (b) pore size distribution of Yb-ZMOF-1, (c)  $V(1-P/P_0)$  vs.  $P/P_0$  for Yb-ZMOF-1. Only the range below  $P/P_0 = 0.20$  satisfies the first consistency criterion for applying the BET theory and (d) plot of the linear region for the BET equation.

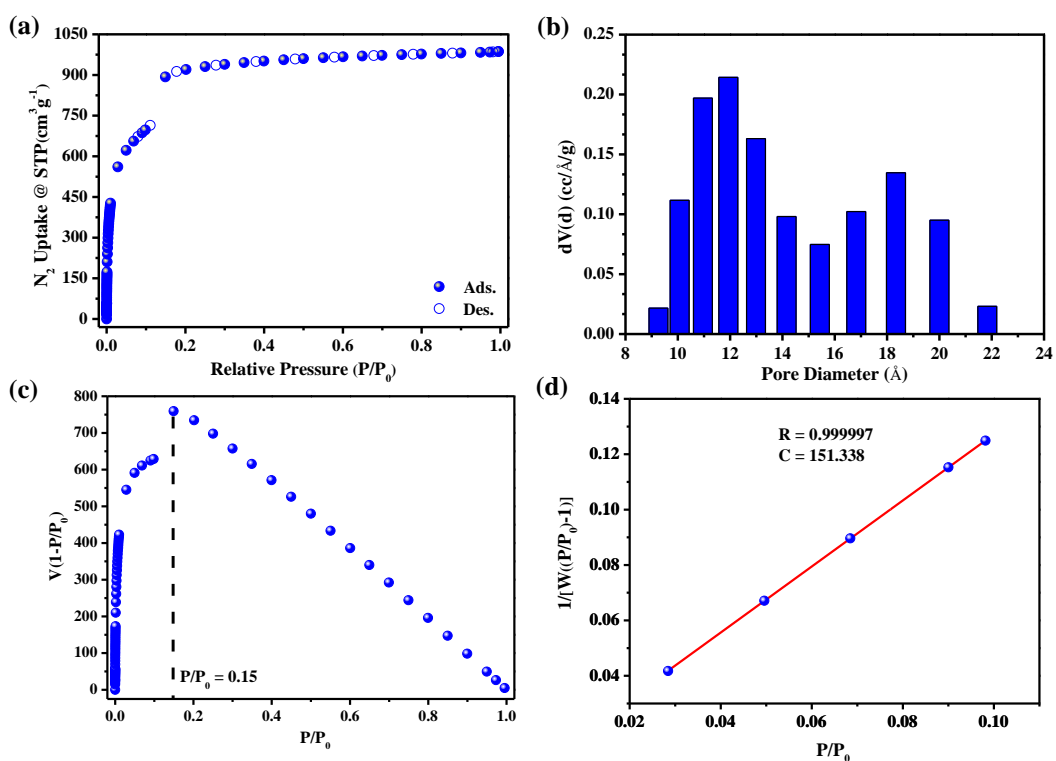

**Fig. S14** (a) Adsorption (closed) / desorption (open) isotherms and (b) pore size distribution of Y-ZMOF-1, (c)  $V(1-P/P_0)$  vs.  $P/P_0$  for Y-ZMOF-1. Only the range below  $P/P_0 = 0.15$  satisfies the first consistency criterion for applying the BET theory and (d) plot of the linear region for the BET equation.

**Table S1.** The BET surface areas summary of investigated ZMOFs.

| <b>Materials</b>                                                 | <b>Net</b> | <b>BET (m<sup>2</sup> g<sup>-1</sup>)</b> | <b>Ref.</b> |
|------------------------------------------------------------------|------------|-------------------------------------------|-------------|
| [{Zn(mim) <sub>2</sub> ·2H <sub>2</sub> O} <sub>∞</sub> ]        | <b>sod</b> | 1030                                      | 1           |
| [{Zn(eim) <sub>2</sub> ·H <sub>2</sub> O} <sub>∞</sub> ]         | <b>ana</b> | 28.7                                      |             |
| [{Zn(eim/mim) <sub>2</sub> ·1.25H <sub>2</sub> O} <sub>∞</sub> ] | <b>rho</b> | –                                         |             |
| [Pd(2-pymo) <sub>2</sub> ] <sub>n</sub>                          | <b>sod</b> | 600                                       | 2           |
| [Cu(2-pymo) <sub>2</sub> ] <sub>n</sub>                          | <b>sod</b> | 350                                       |             |
| [Cu(4-pymo) <sub>2</sub> ] <sub>n</sub>                          | <b>sod</b> | 65                                        |             |
| {[Zn(btz)]·DMF·0.5H <sub>2</sub> O} <sub>n</sub>                 | <b>sod</b> | 1151                                      | 3           |
| IFMC-1                                                           | <b>sod</b> | 780                                       | 4           |
| ZIF-8                                                            | <b>sod</b> | 1630                                      | 5           |
| ZIF-11                                                           | <b>rho</b> | –                                         |             |
| ZIF-95                                                           | <b>poz</b> | 1050                                      | 6           |
| ZIF-100                                                          | <b>moz</b> | 595                                       |             |
| ZIF-68                                                           | <b>gme</b> | 1090                                      | 7           |
| ZIF-69                                                           | <b>gme</b> | 950                                       |             |
| ZIF-70                                                           | <b>gme</b> | 1730                                      |             |
| ZIF-78                                                           | <b>gme</b> | 620                                       |             |
| ZIF-79                                                           | <b>gme</b> | 810                                       |             |
| ZIF-81                                                           | <b>gme</b> | 760                                       |             |
| ZIF-82                                                           | <b>gme</b> | 1300                                      |             |
| ZIF-93                                                           | <b>rho</b> | 864                                       | 8           |
| ZIF-94                                                           | <b>sod</b> | 480                                       |             |
| ZIF-25                                                           | <b>rho</b> | 1110                                      | 9           |
| ZIF-71                                                           | <b>rho</b> | 652                                       |             |
| ZIF-96                                                           | <b>rho</b> | 960                                       |             |
| ZIF-97                                                           | <b>rho</b> | 564                                       |             |
| ZIF-300                                                          | <b>cha</b> | 420                                       | 10          |
| ZIF-301                                                          | <b>cha</b> | 680                                       |             |
| ZIF-302                                                          | <b>cha</b> | 240                                       |             |
| ZIF-303                                                          | <b>cha</b> | –                                         | 11          |
| ZIF-360                                                          | <b>kfi</b> | 1050                                      |             |
| ZIF-365                                                          | <b>kfi</b> | 920                                       |             |
| ZIF-376                                                          | <b>lta</b> | –                                         |             |
| ZIF-386                                                          | <b>afx</b> | 740                                       |             |
| ZIF-408                                                          | <b>moz</b> | –                                         |             |
| ZIF-410                                                          | <b>gme</b> | 800                                       |             |
| ZIF-486                                                          | <b>gme</b> | 1180                                      |             |
| ZIF-412                                                          | <b>ucb</b> | 1520                                      |             |
| ZIF-413                                                          | <b>ucb</b> | 1290                                      |             |
| ZIF-414                                                          | <b>ucb</b> | 1440                                      |             |
| ZIF-516                                                          | <b>ykh</b> | 640                                       |             |

|                                                                                                                    |                       |                               |                  |
|--------------------------------------------------------------------------------------------------------------------|-----------------------|-------------------------------|------------------|
| ZIF-586                                                                                                            | <b>ykh</b>            | –                             |                  |
| ZIF-615                                                                                                            | <b>gcc</b>            | 770                           |                  |
| ZIF-725                                                                                                            | <b>bam</b>            | 720                           |                  |
| TIF1-Zn                                                                                                            | <b>zea</b>            | 667.5(S <sub>Langmuir</sub> ) | 12               |
| TIF-2                                                                                                              | <b>zeb</b>            | 618.2(S <sub>Langmuir</sub> ) | 13               |
| BIF-3-Cu                                                                                                           | <b>sod</b>            | 182.3(S <sub>Langmuir</sub> ) | 14               |
| BIF-3-Li                                                                                                           | <b>sod</b>            | 726.5(S <sub>Langmuir</sub> ) |                  |
| MIL-101c                                                                                                           | <b>mtn</b>            | 4230                          | 15, 16           |
| MIL-100                                                                                                            | <b>mtn</b>            | 3100                          | 17               |
| rho-ZMOF                                                                                                           | <b>rho</b>            | 1067                          | 18               |
| sod-ZMOF                                                                                                           | <b>sod</b>            | –                             |                  |
| [Tb <sub>16</sub> (TATB) <sub>16</sub> (DMA) <sub>24</sub> ]·(DMA) <sub>91</sub> (H <sub>2</sub> O) <sub>108</sub> | <b>mtn</b>            | 1783                          | 19               |
| [Cd(pymc) <sub>2</sub> ]·7H <sub>2</sub> O                                                                         | <b>rho</b>            | 804(S <sub>Langmuir</sub> )   | 20               |
| usf-ZMOF                                                                                                           | <b>med</b>            | 520(S <sub>Langmuir</sub> )   | 21               |
| ZSA-1                                                                                                              | <b>gis</b>            | 1382                          | 22               |
| ZSA-2                                                                                                              | <b>rho</b>            | 395                           |                  |
| Li <sub>4</sub> (OPy) <sub>4</sub>                                                                                 | <b>aco</b>            | 440.3                         | 23               |
| (Et <sub>2</sub> NH <sub>2</sub> )[In(BCBAIP)]·4DEF·4EtOH                                                          | <b>sod</b>            | 209                           | 24               |
| PCN-777                                                                                                            | <b>β-cristobalite</b> | 2008                          | 25               |
| JLU-Liu23                                                                                                          | <b>unj</b>            | 584                           | 26               |
| Y-kex-MOF-1                                                                                                        | <b>afx</b>            | 1580                          | 27               |
| ZSA-10                                                                                                             | <b>mer</b>            | 724                           | 28               |
| ZSA-11                                                                                                             | <b>abw</b>            | –                             |                  |
| Zr-sod-ZMOF-1                                                                                                      | <b>sod</b>            | 1565                          | 29               |
| Zr-sod-ZMOF-2                                                                                                      | <b>sod</b>            | –                             |                  |
| <b>Yb-ZMOF-1</b>                                                                                                   | <b>gme</b>            | <b>2107</b>                   | <b>This work</b> |
| <b>Y-ZMOF-1</b>                                                                                                    | <b>gme</b>            | <b>2902</b>                   |                  |

---

## 6. High-pressure gas sorption measurements

High-pressure excess gas sorption isotherms were measured with an automatic volumetric sorption apparatus (BELSORP-HP) in the range of 0–80 bar. The bath temperature for CH<sub>4</sub> sorption measurements was controlled using a recirculating bath containing an ethylene glycol/H<sub>2</sub>O mixture. Ultrahigh purity He was used to determine the dead space of the sample cell. The adsorption data were corrected to give the final gravimetric excess adsorption isotherm  $n_{ex}(P, T)$ , by subtracting the background adsorption measured with the empty sample cell using the same test parameters. The total sorption, which represents the real gas-storage performance of the porous material but cannot be directly measured, was calculated by [Eqn. (1)]:

$$n_{tot}(P, T) = n_{ex}(P, T) + \rho_{gas}(P, T) \times V_p \quad (1)$$

Where  $\rho_{gas}(P, T)$  is the density of bulk methane at pressure  $P$  and temperature  $T$ , and  $V_p$  is the pore volume of the porous material determined from N<sub>2</sub> adsorption isotherm at 77 K.

The isosteric enthalpy of adsorption,  $Q_{st}$  for CH<sub>4</sub> was determined by fitting the adsorption isotherms at 298 and 273 K to the Dual-site Langmuir equation (Eqn 2);

$$n = \frac{n_{L,A} b_A p}{1 + b_A p} + \frac{n_{L,B} b_B p}{1 + b_B p} \quad (2)$$

Where  $n$  is the amount of gas adsorbed in mmol/g,  $P$  is the pressure in Pa,  $n_{L,A}$  and  $n_{L,B}$  are the saturation capacity in mmol/g, and  $b_A$  and  $b_B$  are the Langmuir parameter up to two sites 1 and 2.

Using the Dual-site Langmuir fit, the isosteric heat of adsorption can be calculated for each material as a function of the total amount of CH<sub>4</sub> adsorbed using the Clausius-Clapeyron relation (Eqn 3).

$$\frac{d \ln p}{dT} = \frac{\Delta H}{nRT^2} = \frac{\Delta_r H_m}{RT^2} \quad (3)$$

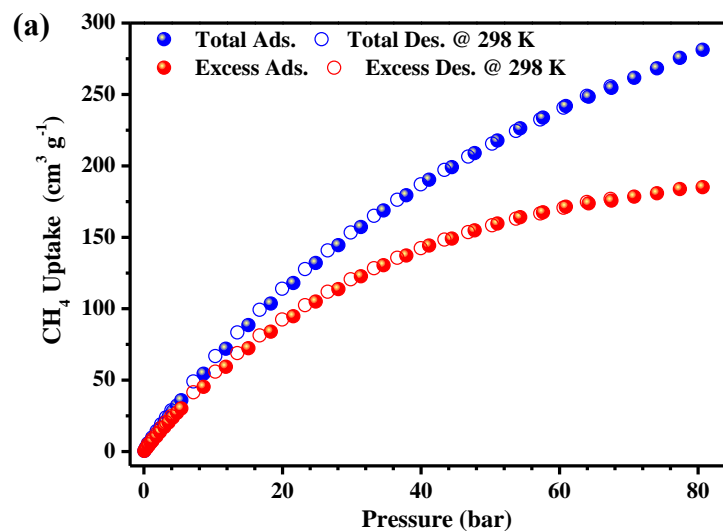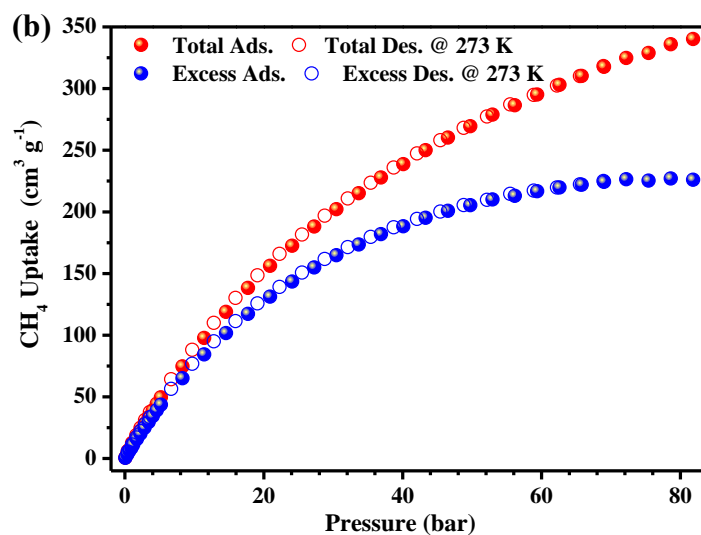

**Fig. S15** High-pressure methane adsorption (closed) / desorption (open) isotherms of Yb-ZMOF-1.

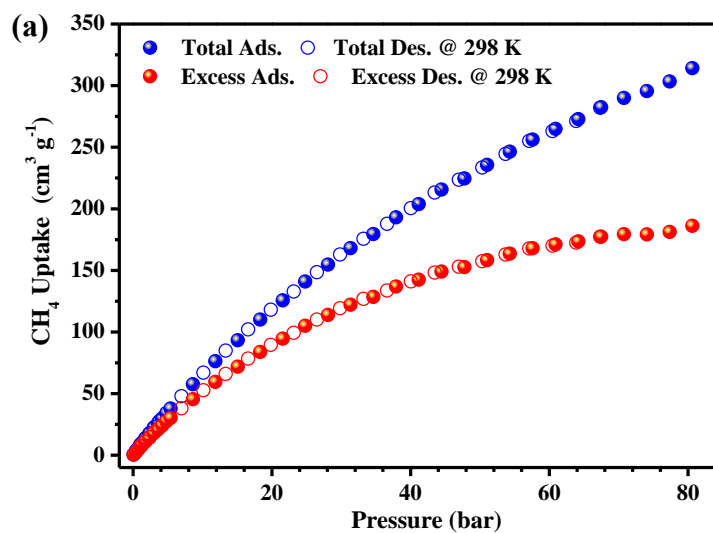

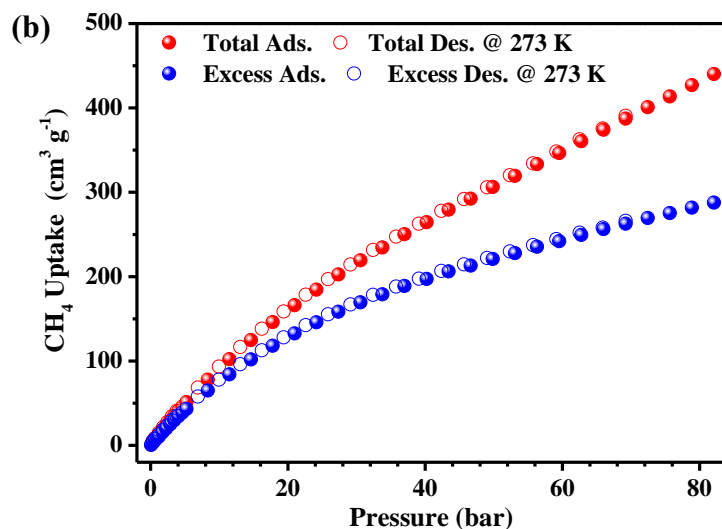

**Fig. S16** High-pressure methane adsorption (closed) / desorption (open) isotherms of Y-ZMOF-1.

**Table S2.** The methane adsorption data summary of Yb-ZMOF-1 and Y-ZMOF-1.

| Name      | BET<br>( $\text{m}^2 \text{g}^{-1}$ ) | $V_p$<br>( $\text{cm}^3 \text{g}^{-1}$ ) | $\rho$<br>( $\text{g cm}^{-3}$ ) | T (K) | Uptake<br>( $\text{cm}^3 \text{g}^{-1}$ )<br>5 / 65 / 80 bar | Working<br>capacity<br>( $\text{cm}^3 \text{g}^{-1}$ )<br>5 - 65 / 80 bar | Uptake<br>( $\text{cm}^3 \text{cm}^{-3}$ )<br>5 / 65 / 80 bar | Working<br>capacity<br>( $\text{cm}^3 \text{cm}^{-3}$ )<br>5 - 65 / 80 bar | Uptake<br>( $\text{g g}^{-1}$ )<br>5 / 65 / 80 bar | Working<br>capacity<br>( $\text{g g}^{-1}$ )<br>5 - 65 / 80 bar | $Q_{st}$<br>( $\text{kJ mol}^{-1}$ ) |
|-----------|---------------------------------------|------------------------------------------|----------------------------------|-------|--------------------------------------------------------------|---------------------------------------------------------------------------|---------------------------------------------------------------|----------------------------------------------------------------------------|----------------------------------------------------|-----------------------------------------------------------------|--------------------------------------|
| Yb-ZMOF-1 | 2107                                  | 1.15                                     | 0.585640                         | 298   | 34 / 250 / 281                                               | 216 / 247                                                                 | 20 / 147 / 164                                                | 127 / 144                                                                  | 0.02 / 0.18 / 0.20                                 | 0.16 / 0.18                                                     | 9.5                                  |
|           |                                       |                                          |                                  | 273   | 48 / 309 / 339                                               | 261 / 291                                                                 | 28 / 181 / 198                                                | 153 / 170                                                                  | 0.03 / 0.22 / 0.24                                 | 0.19 / 0.21                                                     |                                      |
| Y-ZMOF-1  | 2902                                  | 1.53                                     | 0.469552                         | 298   | 36 / 275 / 313                                               | 239 / 277                                                                 | 17 / 129 / 147                                                | 112 / 130                                                                  | 0.03 / 0.20 / 0.22                                 | 0.17 / 0.19                                                     | 8.5                                  |
|           |                                       |                                          |                                  | 273   | 50 / 370 / 432                                               | 320 / 382                                                                 | 23 / 174 / 203                                                | 151 / 180                                                                  | 0.04 / 0.27 / 0.31                                 | 0.23 / 0.27                                                     |                                      |

**Table S3.** Experimental methane deliverable capacities of the investigated MOFs.

| MOF          | T/K | Working capacity<br>5-80 bar ( $\text{g g}^{-1}$ ) | Ref.      |
|--------------|-----|----------------------------------------------------|-----------|
| ST-2         | 273 | 0.43                                               | 30        |
| Al-soc-MOF-1 | 273 | 0.5                                                | 31        |
| NU-1500-Al   | 270 | 0.3                                                | 32        |
| Ni-MOF-74    | 273 | 0.08                                               | 33        |
| HKUST-1      | 273 | 0.15                                               | 33        |
| Yb-ZMOF-1    | 273 | 0.21                                               | This work |
| Y-ZMOF-1     | 273 | 0.27                                               |           |



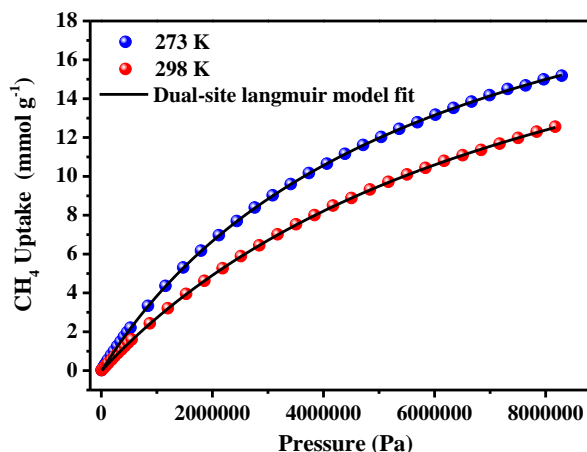

**Fig. S17** Dual-site Langmuir model fitting (lines) of CH<sub>4</sub> adsorption isotherms (points) for Yb-ZMOF-1 measured at 273 and 298 K.

**Table S4.** The obtained Dual-site Langmuir model fitting parameters for Yb-ZMOF-1.

| T (K) | $n_{L,A}$ | $n_{L,B}$ | $b_A$      | $b_B$      | $R^2$    |
|-------|-----------|-----------|------------|------------|----------|
| 273   | 0.772443  | 2.53006   | 6.53704E-7 | 1.64018E-7 | 0.999989 |
| 298   | 25.1521   | 0.0390026 | 1.20785E-7 | 6.45643E-6 | 0.999986 |

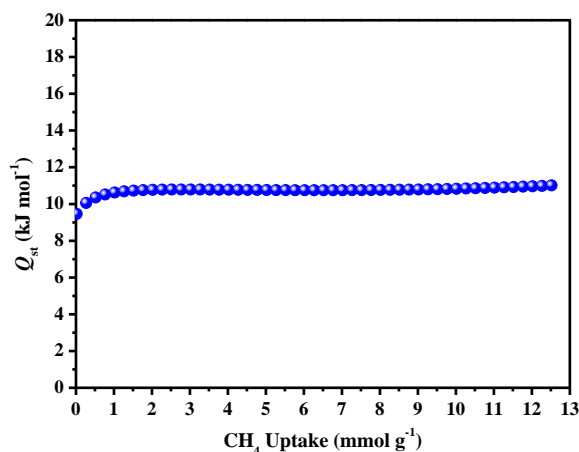

**Fig. S18** Heats of CH<sub>4</sub> adsorption ( $Q_{st}$ ) for Yb-ZMOF-1, which were calculated from the Dual-site Langmuir model fitting of adsorption isotherms at 273 and 298 K as a function of the total CH<sub>4</sub> uptake amount using the Clausius-Clapeyron equation:

$$\frac{d \ln p}{dT} = \frac{\Delta H}{nRT^2} = \frac{\Delta_r H_m}{RT^2}.$$

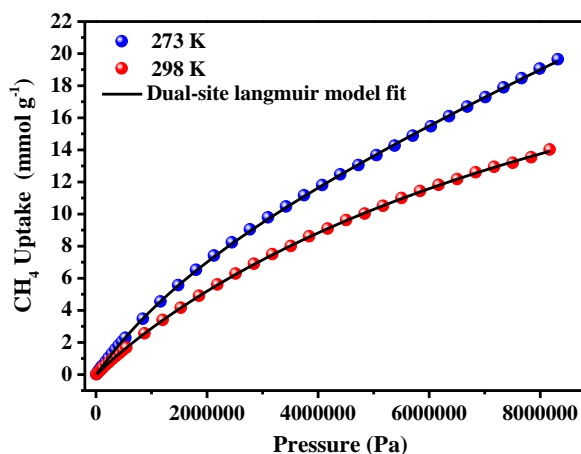

**Fig. S19** Dual-site Langmuir model fitting (lines) of CH<sub>4</sub> adsorption isotherms (points) for Y-ZMOF-1 measured at 273 and 298 K.

**Table S5.** The obtained Dual-site Langmuir model fitting parameters for Y-ZMOF-1.

| T(K) | $n_{L,A}$ | $n_{L,B}$ | $b_A$      | $b_B$      | $R^2$    |
|------|-----------|-----------|------------|------------|----------|
| 273  | 9.78632   | 3715.14   | 3.57963E-7 | 3.9704E-10 | 0.999941 |
| 298  | 0.509062  | 31.6332   | 1.20178E-6 | 9.07909E-8 | 0.999958 |

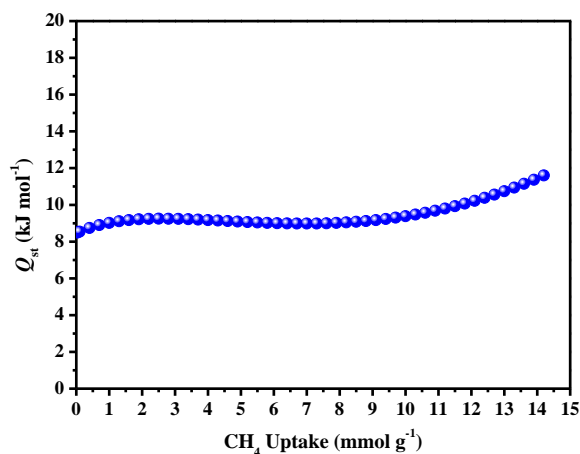

**Fig. S20** Heats of CH<sub>4</sub> adsorption ( $Q_{st}$ ) for Y-ZMOF-1, which were calculated from the Dual-site Langmuir model fitting of adsorption isotherms at 273 and 298 K as a function of the total CH<sub>4</sub> uptake amount using the Clausius-Clapeyron equation:

$$\frac{d \ln p}{dT} = \frac{\Delta H}{nRT^2} = \frac{\Delta_r H_m}{RT^2}.$$

---

## 7. Single Crystal X-ray Crystallography Data

Single-crystal X-ray diffraction data for Yb-ZMOF-1 were collected on a Bruker D8 venture diffractometer (Cu/K $\alpha$ ,  $\lambda = 1.54178 \text{ \AA}$ ) at 153 K. Indexing was performed using APEX3 (Difference Vectors method).<sup>34</sup> Data integration and reduction were performed using SaintPlus 6.01.<sup>35</sup> Absorption correction was performed by multi-scan method implemented in SADABS.<sup>36</sup> Space group was determined using XPREP implemented in APEX3. The structure was solved by direct methods and refined with full-matrix least squares technique using the SHELXT<sup>37</sup> package or refined using SHELXL-2014 (full-matrix least-squares on  $F^2$ ) contained in Olex2.<sup>38</sup> Non-hydrogen atoms were refined with anisotropic displacement parameters during the final cycles. Hydrogen atoms were located at geometrically calculated positions to their carrier atoms and refined with isotropic thermal parameters included in the final stage of the refinement. For this compound, the contributions of heavily disordered solvent molecules were treated as diffuse using Squeeze procedure implemented in Platon program.<sup>39-41</sup>

A summary of the crystallographic data is given in Table S6. CCDC 2163665 (Yb-ZMOF-1) contain the supplementary crystallographic data for this paper. The data can be obtained free of charge from The Cambridge Crystallographic Data Centre.

**Table S6.** Crystal data and refinement results for Yb-ZMOF-1.

| <b>Identification code</b>                    | <b>Yb-ZMOF-1</b>                                                                                |
|-----------------------------------------------|-------------------------------------------------------------------------------------------------|
| Empirical formula                             | C <sub>96</sub> H <sub>60</sub> F <sub>15</sub> N <sub>18</sub> O <sub>32</sub> Yb <sub>9</sub> |
| Formula weight                                | 3819.98                                                                                         |
| Temperature/K                                 | 153.0                                                                                           |
| Wavelength/Å                                  | 1.54178                                                                                         |
| Crystal system                                | Hexagonal                                                                                       |
| Space group                                   | <i>P6<sub>3</sub>/mmc</i>                                                                       |
| Unit cell dimensions/Å                        | $a = 33.598(5)$<br>$c = 22.159(4)$                                                              |
| Volume/Å <sup>3</sup>                         | 21662.5(7)                                                                                      |
| Z                                             | 2                                                                                               |
| Density (calculated)/Mg/m <sup>3</sup>        | 0.586                                                                                           |
| Absorption coefficient/mm <sup>-1</sup>       | 3.674                                                                                           |
| F (000)                                       | 3566.0                                                                                          |
| Crystal size/mm <sup>3</sup>                  | 0.10 x 0.10 x 0.06                                                                              |
| Theta range for data collection/°             | 2.506 to 50.682                                                                                 |
| Index ranges                                  | $-33 \leq h \leq 30$<br>$-26 \leq k \leq 33$<br>$-21 \leq l \leq 22$                            |
| Reflections collected                         | 66891                                                                                           |
| Independent reflections                       | 4197 [ $R(\text{int}) = 0.2190$ ]                                                               |
| Completeness to theta = 50.682°               | 99.3%                                                                                           |
| Refinement method                             | Full-matrix least-squares on $F^2$                                                              |
| Data / restraints / parameters                | 4197 / 294 / 164                                                                                |
| Goodness-of-fit on $F^2$                      | 0.936                                                                                           |
| Final $R$ indices [ $I > 2\sigma(I)$ ]        | $R_1 = 0.0820$ , $wR_2 = 0.2370$                                                                |
| $R$ indices (all data)                        | $R_1 = 0.1148$ , $wR_2 = 0.2648$                                                                |
| Largest diff. peak and hole/e.Å <sup>-3</sup> | 0.72 and -1.51                                                                                  |

---

## 8. References

1. X. C. Huang, Y. Y. Lin, J. P. Zhang and X. M. Chen, *Angew. Chem., Int. Ed.*, 2006, **45**, 1557-1559.
2. J. A. R. Navarro, E. Barea, J. M. Salas, N. Masciocchi, S. Galli, A. Sironi, C. O. Ania and J. B. Parra, *Inorg. Chem.*, 2006, **45**, 2397-2399.
3. P. Cui, Y. G. Ma, H. H. Li, B. Zhao, J. R. Li, P. Cheng, P. B. Balbuena and H. C. Zhou, *J. Am. Chem. Soc.*, 2012, **134**, 18892-18895.
4. J.-S. Qin, D.-Y. Du, W.-L. Li, J.-P. Zhang, S.-L. Li, Z.-M. Su, X.-L. Wang, Q. Xu, K.-Z. Shao and Y.-Q. Lan, *Chem. Sci.*, 2012, **3**, 2114-2118.
5. K. S. Park, Z. Ni, A. P. Cote, J. Y. Choi, R. Huang, F. J. Uribe-Romo, H. K. Chae, M. O'Keeffe and O. M. Yaghi, *Proc. Natl. Acad. Sci. U.S.A.*, 2006, **103**, 10186-10191.
6. B. Wang, A. P. Cote, H. Furukawa, M. O'Keeffe and O. M. Yaghi, *Nature*, 2008, **453**, 207-211.
7. R. Banerjee, H. Furukawa, D. Britt, C. Knobler, M. O'Keeffe and O. M. Yaghi, *J. Am. Chem. Soc.*, 2009, **131**, 3875-3877.
8. W. Morris, N. He, K. G. Ray, P. Klonowski, H. Furukawa, I. N. Daniels, Y. A. Houndonougbo, M. Asta, O. M. Yaghi and B. B. Laird, *J. Phys. Chem. C*, 2012, **116**, 24084-24090.
9. Y. Houndonougbo, C. Signer, N. He, W. Morris, H. Furukawa, K. G. Ray, D. L. Olmsted, M. Asta, B. B. Laird and O. M. Yaghi, *J. Phys. Chem. C*, 2013, **117**, 10326-10335.
10. N. T. T. Nguyen, H. Furukawa, F. Gandara, H. T. Nguyen, K. E. Cordova and O. M. Yaghi, *Angew. Chem., Int. Ed.*, 2014, **53**, 10645-10648.
11. J. Yang, Y. B. Zhang, Q. Liu, C. A. Trickett, E. Gutierrez-Puebla, M. A. Monge, H. Cong, A. Aldossary, H. Deng and O. M. Yaghi, *J. Am. Chem. Soc.*, 2017, **139**, 6448-6455.
12. T. Wu, X. Bu, R. Liu, Z. Lin, J. Zhang and P. Feng, *Chem. Eur. J.*, 2008, **14**,

---

7771-7773.

13. T. Wu, X. Bu, J. Zhang and P. Feng, *Chem. Mater.*, 2008, **20**, 7377-7382.
14. J. Zhang, T. Wu, C. Zhou, S. Chen, P. Feng and X. Bu, *Angew. Chem., Int. Ed.*, 2009, **48**, 2542-2545.
15. G. Ferey, C. Mellot-Draznieks, C. Serre, F. Millange, J. Dutour, S. Surble and I. Margiolaki, *Science*, 2005, **309**, 2040-2042.
16. P. L. Llewellyn, S. Bourrelly, C. Serre, A. Vimont, M. Daturi, L. Hamon, G. De Weireld, J.-S. Chang, D.-Y. Hong, Y. K. Hwang, S. H. Jhung and G. Ferey, *Langmuir*, 2008, **24**, 7245-7250.
17. G. Ferey, C. Serre, C. Mellot-Draznieks, F. Millange, S. Surble, J. Dutour and I. Margiolaki, *Angew. Chem., Int. Ed.*, 2004, **43**, 6296-6301.
18. Y. Liu, V. Kravtsov, R. Larsen and M. Eddaoudi, *Chem. Commun.*, 2006, 1488-1490.
19. Y. K. Park, S. B. Choi, H. Kim, K. Kim, B.-H. Won, K. Choi, J.-S. Choi, W.-S. Ahn, N. Won, S. Kim, D. H. Jung, S.-H. Choi, G.-H. Kim, S.-S. Cha, Y. H. Jhon, J. K. Yang and J. Kim, *Angew. Chem., Int. Ed.*, 2007, **46**, 8230-8233.
20. J. Y. Zhang, A. L. Cheng, Q. Yue, W. W. Sun and E. Q. Gao, *Chem. Commun.*, 2008, 847-849.
21. Y. Liu, V. Kravtsov and M. Eddaoudi, *Angew. Chem., Int. Ed.*, 2008, **47**, 8446-8449.
22. S. Wang, T. Zhao, G. Li, L. Wojtas, Q. Huo, M. Eddaoudi and Y. Liu, *J. Am. Chem. Soc.*, 2010, **132**, 18038-18041.
23. X. Zhao, T. Wu, S.-T. Zheng, L. Wang, X. Bu and P. Feng, *Chem. Commun.*, 2011, **47**, 5536-5538.
24. L. Sun, H. Xing, Z. Liang, J. Yu and R. Xu, *Chem. Commun.*, 2013, **49**, 11155-11157.
25. D. Feng, K. Wang, J. Su, T. F. Liu, J. Park, Z. Wei, M. Bosch, A. Yakovenko, X. Zou and H. C. Zhou, *Angew. Chem., Int. Ed.*, 2015, **54**, 149-154.
26. X. Luo, Y. Cao, T. Wang, G. Li, J. Yon, Y. Yang, Z. Xu, J. Zhang, Q. Huo, Y. Liu and M. Eddaoudi, *J. Am. Chem. Soc.*, 2016, **138**, 786-789.

- 
27. Z. Chen, Z. Thiam, A. Shkurenko, L. J. Weselinski, K. Adil, H. Jiang, D. Alezi, A. H. Assen, M. O'Keeffe and M. Eddaoudi, *J. Am. Chem. Soc.*, 2019, **141**, 20480-20489.
  28. J. Li, L. Kan, J. Li, Y. Liu and M. Eddaoudi, *Angew. Chem., Int. Ed.*, 2020, **59**, 19659-19662.
  29. N. Alsadun, G. Mouchaham, V. Guillerm, J. Czaban-Jozwiak, A. Shkurenko, H. Jiang, P. M. Bhatt, P. Parvatkar and M. Eddaoudi, *J. Am. Chem. Soc.*, 2020, **142**, 20547-20553.
  30. C.-C. Liang, Z.-L. Shi, C.-T. He, J. Tang, H.-D. Zhou, H.-L. Zhou, Y. Lee and Y.-B. Zhang, *J. Am. Chem. Soc.*, 2017, **139**, 13300-13303.
  31. D. Alezi, Y. Belmabkhout, M. Suyetin, P. M. Bhatt, L. J. Weselinski, V. Solovyeva, K. Adil, I. Spanopoulos, P. N. Trikalitis, A.-H. Emwas and M. Eddaoudi, *J. Am. Chem. Soc.*, 2015, **137**, 13308-13318.
  32. Z. Chen, P. Li, R. Anderson, X. Wang, X. Zhang, L. Robison, L. R. Redfern, S. Moribe, T. Islamoglu, D. A. Gomez-Gualdron, T. Yildirim, J. F. Stoddart and O. K. Farha, *Science*, 2020, **368**, 297-303.
  33. J. A. Mason, M. Veenstra and J. R. Long, *Chem. Sci.*, 2014, **5**, 32-51.
  34. Bruker APEX2; Bruker AXS, Inc.: Madison, WI, 2010.
  35. Bruker SAINT, Data Reduction Software; Bruker AXS, Inc.: Madison, WI, 2009.
  36. G. M. Sheldrick, University of Gottingen: Gottingen, Germany, 1996.
  37. G. M. Sheldrick, *Acta Crystallogr.*, 2015, **A71**, 3-8.
  38. O. V. Dolomanov, L. J. Bourhis, R. J. Gildea, J. A. K. Howard, H. Puschmann, *J. Appl. Crystallogr.*, 2009, **42**, 339-341.
  39. A. L. Spek, *Acta Crystallogr.*, 1990, **A46**, 194-201.
  40. A. L. Spek, *J. Appl. Crystallogr.*, 2003, **36**, 7-13.
  41. A. L. Spek, *Acta Crystallogr.*, 2009, **D65**, 148-155.
